# Supplementary material for: Enhanced Anti-Skin-Aging Activity of Yeast Extract-Treated Resveratrol Rice DJ526
Source: MDPI journal article supplement (doi:10.3390/molecules27061951), 2022-03-17

## Supplementary information

Table S1 Primer sequences used for real-time PCR experiments

|    | Genes         | Sequences                                                                          |
|----|---------------|------------------------------------------------------------------------------------|
| 1  | GAPDH         | Forward 5'-AACTTTGGCATTGTGGAAGG-3'<br>Reverse 5'-ACACATTGGGGGTAGGAACA              |
| 2  | MITF          | Forward 5'-TGAAGGTCGGTGTGAACGGATTTCGC-3'<br>Reverse 5'-CATGTAGGCCATGAGGTCCACCAC-3' |
| 3  | Tyrosinase    | Forward 5'-GACGGTCACTGCAGACTTTG-3'<br>Reverse 5'-GCCATGACCAGGATGAC-3'              |
| 4  | TRP-1         | Forward 5'-ACTTCACTCAAGCCAACTGC 3'<br>Reverse 5'-AGCTTCCCATCAGATGTCGT 3'           |
| 5  | TRP-2         | Forward 5'GCTCCAAGTGGCTGTAGACC 3'<br>Reverse 5' AATGCAGTGGCTTGGAATC 3'             |
| 6  | HPRT1         | Forward 5' TGCTCGAGATGTGATGAAGG 3'<br>Reverse 5' TCCCCTGTTGACTGGTCATT 3'           |
| 6  | TNF- $\alpha$ | Forward 5' CAGAGGGCCTGTACCTCATC 3'<br>Reverse 5' GGAAGACCCCTCCCAGATAG 3'           |
| 7  | MMP-2         | Forward 5' GCTGTATGTCCTGTCGCTCA 3'<br>Reverse 5' TGCTGAAAGAAATGCACACC 3'           |
| 8  | MMP-9         | Forward 5' TCTTCCCTCCCATCAGTTTG 3'<br>Reverse 5' GGACACCAGACCAAGGAAGA 3'           |
| 9  | MMP-13        | Forward 5' CTTCTGGTCAACCTCTCCA 3'<br>Reverse 5' CCAATGGCACCTTCTCTTT 3'             |
| 10 | COL1A1        | Forward 5' GCAAGATGGAGTCAGGGAAA 3'<br>Reverse 5' AGCCAGCAGATCGAGAACAT 3'           |
| 11 | Filaggrin     | Forward 5' CCGATATCAGGACACAAGCA 3'<br>Reverse 5' TGTTTCTCTTGGGCTCTTGG3'            |

Figure S1 HPLC chromatogram analysis of total resveratrol product (resveratrol and piceid content) of methanolic DJ 526 and yeast extract-treated DJ526 seed extracts. Piceid presents at retention time 16.8 min. and resveratrol presents at 27.6 min.

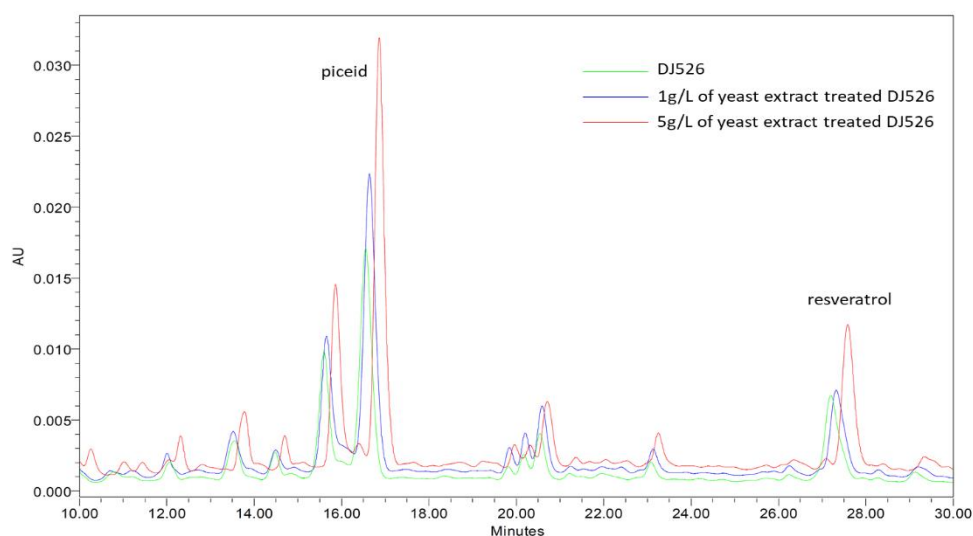

Figure S2 Calibration curve of vitamin C at concentration 0.0039065 to 0.25 mg/mL.

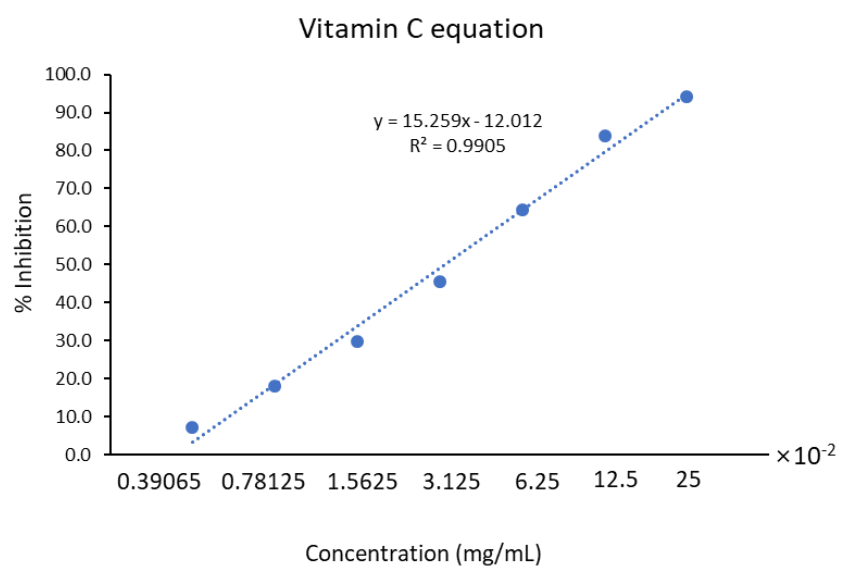

Supplement: s1 [file s1]
